# Supplementary material for: 3D porous Ni/NiOx as a bifunctional oxygen electrocatalyst derived from freeze-dried Ni(OH)2
Source: Royal Society of Chemistry journal article supplement (doi:10.1039/d0nr08034a), 2021-01-01
Supplement: d0nr08034a1.pdf [file d0nr08034a1.pdf]

### 3D Porous Ni/NiO<sub>x</sub> as a bifunctional oxygen electrocatalyst derived from Freeze dried Ni(OH)<sub>2</sub>

Yuta Shudo,<sup>a</sup> Masahiro Fukuda,<sup>a</sup> Md. Saidul Islam,<sup>a, b</sup> Keita Kuroiwa,<sup>c</sup> Yoshihiro Sekine,<sup>a</sup> Mohammad Razaul Karim,<sup>d, e</sup> and Shinya Hayami <sup>\*a, b</sup>

- a. *Department of Chemistry, Graduate School of Science and Technology, Kumamoto University, 2-39-1 Kurokami, Chuo-ku, Kumamoto 860-8555, Japan.*
- b. *Institute of Industrial Nanomaterials (IINa), Kumamoto University, 2-39-1 Kurokami, Chuo-ku, Kumamoto 860-8555, Japan*
- c. *Department of Nanoscience, Faculty of Engineering, Sojo University, 4-22-1 Ikeda, Nishi-ku, Kumamoto 860-0082, Japan*
- d. *Department of Chemistry, School of physical Science, Shahjalal University of Science and Technology, Sylhet-3114, Bangladesh*
- e. *Department of Chemistry, King Abdulaziz University, Jeddah 21589, Saudi Arabia*

This PDF file includes:

Calculation of Tafel slope and Turnover Frequency (TOF) for OER.

Calculation of the Koutechy-Levich (K-L) plot for OER.

Calculation of the hydrogen peroxide yield on ORR.

**Figure S1.** The SEM image of Freeze-dried Ni(OH)<sub>2</sub>

**Figure S2.** XPS survey spectrum of freeze-dried Ni/NiO<sub>x</sub>.

**Figure S3.** HAADF-STM-EDS spectra of the freeze-dried Ni/NiO<sub>x</sub>.

**Figure S4.** CV of a) ordinary Ni/NiO<sub>x</sub>, b) freeze-dried Ni/NiO<sub>x</sub>, c) freeze-dried Ni(OH)<sub>2</sub> and d) freeze-dried NiO collected at different scan rate in 1.0 M KOH solution. e) Calculated double-layer capacitance (C<sub>dl</sub>) each sample.

**Figure S5.** The OER curves of Freeze-dried Ni/NiO<sub>x</sub> between 1st and 100th.

**Figure S6.** The chronoamperometric response of freeze-dried Ni/NiO<sub>x</sub> at 1.5V

**Figure S7.** The OER curves of Freeze-dried Ni/NiO<sub>x</sub> after measurement.

**Figure S8.** XPS spectra of Freeze-dried Ni/NiO<sub>x</sub> after 100 scans.

**Figure S9.** The CV measurement of freeze-dried Ni/NiO<sub>x</sub> under N<sub>2</sub> or O<sub>2</sub>.

**Figure S10.** The yield of hydrogen peroxide on the ring electrode.

**Figure S11.** LSV curves for OER and ORR to evaluate  $\Delta E$ .

**Table S1.** Comparison of the OER and ORR activity of freeze-dried Ni/NiO<sub>x</sub> with those of Ni based products in reference.

**Calculation of Tafel slope and Turnover Frequency (TOF) for OER.** The Tafel plot is calculated by following equation:

$$\eta = a + b \times \log i$$

Where  $\eta$  is the over potential ( $\eta = E_{RHE} - 1.23$ ),  $a$  is y-intercept,  $b$  is the Tafel slop, and  $i$  (mA / cm<sup>2</sup>) is the current density.

The TOF:

$$TOF = j \times A / (4 \times F \times n)$$

Where  $j$  is the current density,  $A$  is the surface area of the RDE,  $F$  is Faraday's constant (96485 C mol<sup>-1</sup>), and  $n$  is the moles of sample on the RDE.

**Calculation of the Koutechy-Levich (K-L) plot for OER.** The number of electron transfer for ORR can be attributed by the K-L equation:

$$i^{-1} = i_k^{-1} + \left(0.62 \times n \times F \times A \times D_0^{2/3} \times \omega^{1/2} \times \nu^{-1/6} \times C_{O_2}\right)^{-1}$$

$$i^{-1} = i_k^{-1} + B^{-1} \times \omega^{-1/2}$$

$$B = 0.62 \times n \times F \times A \times D_0^{2/3} \times \nu^{-1/6} \times C_{O_2}$$

Where  $i_k$  is the kinetic current, and  $\omega$  is the rotating rate of RRDE.  $B^{-1}$ , based on the Levich equation, is attributed to K-L slope. Where  $n$  is the number or electron transfer for ORR,  $F$  is Faraday's constant (96485 C mol<sup>-1</sup>),  $A$  is Surface area,  $D_0$  is the diffusion coefficient of Oxygen ( $1.9 \times 10^{-5}$  cm<sup>2</sup> s<sup>-1</sup>),  $\nu$  is kinematic viscosity (0.01 cm<sup>2</sup> s<sup>-1</sup>),  $C_{O_2}$  is the bulk concentration of O<sub>2</sub> ( $1.2 \times 10^{-6}$ ).

$\omega$

**Calculation of the hydrogen peroxide yield on ORR.** The hydrogen peroxide yield (%) and the electron transfer number were determined by RRDE and follow equation.

$$H_2O_2 (\%) = 2 \times 100 \times \frac{I_r / N}{I_d + I_r / N}$$

$$n = \frac{4 \times I_d}{I_d + I_r / N}$$

Where  $I_r$  is current density of ring electrode,  $I_d$  is current density of disk electrode,  $N$  is

current efficiency of the ring electrode ( $N=0.4$ ).

Cyclic voltammetry is performed with various scan rating (0.1, 0.08, 0.05, 0.01, 0.005 V/s).

For Linear sweep voltammetry (LSV) of OER, electrode is measured

### **BET Surface area measurement**

Surface area measurement according to Brunauer, Emmett and Teller (BET) is equivalent to determining the amount of gas required to form a monomolecular or "monolayer" covering of gas on the solid substrate. Knowing the cross-section and number of gas molecules that make up the monolayer, the surface area of that substrate can easily be calculated.

The relevant mathematical formulation for B.E.T. equation is

$$\frac{1}{V(P_0/P-1)} = \frac{1}{(V_m C) + ((C-1))} \frac{P}{P_0}$$

where  $V$  is the total volume of gas adsorbed at the measured pressure  $P$ ;  $V_m$  is the volume required to cover the solid surface by monomolecular gas layer;  $P_0$  is the saturating pressure of the gas at the adsorption temperature and  $C$  is a constant. By taking the ' $1/(V(P_0/P-1))$ ' as the ordinate and  $P/P_0$  as the abscissa, a straight line of slope  $(C - 1)/(V_m C)$  is obtained, with the intercept at the origin being  $1/V_m C$ .

To calculate these values, the BET equation is plotted as an adsorption isotherm typically at a relative pressure ( $P/P_0$ ) between 0.05-0.30. In this range it forms a straight line. Sample does not produce a linear adsorption isotherm over the standard BET range ( $P/P_0 = 0.05-0.3$ ). In particular, non-linearity is often obtained at  $P/P_0$  values below 0.05 and after 0.3.

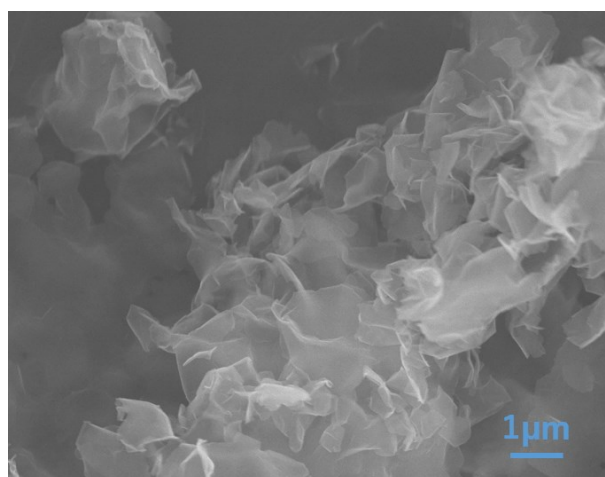

Fig. S1 The SEM image of Freeze-dried Ni(OH)<sub>2</sub>

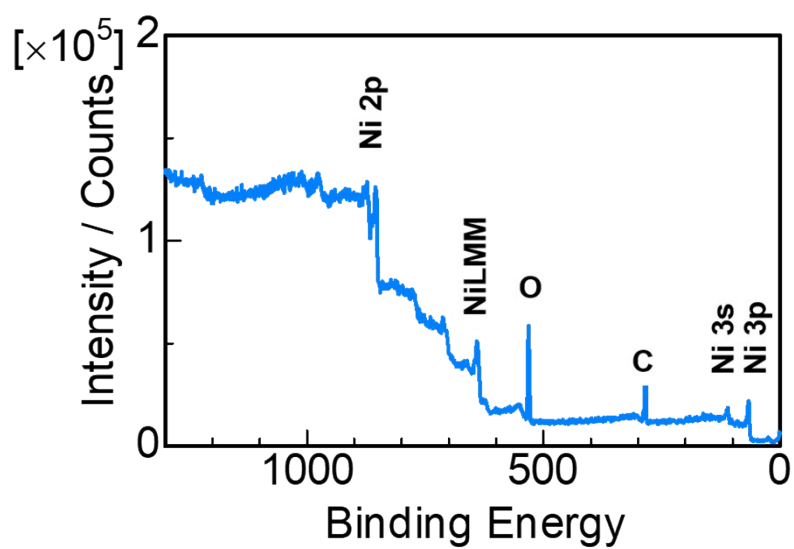

Fig. S2 XPS survey spectrum of freeze-dried Ni/NiO<sub>x</sub>. Elemental composition of Ni/NiO<sub>x</sub> includes Nickel (20.0%) and Oxygen (66.7%).

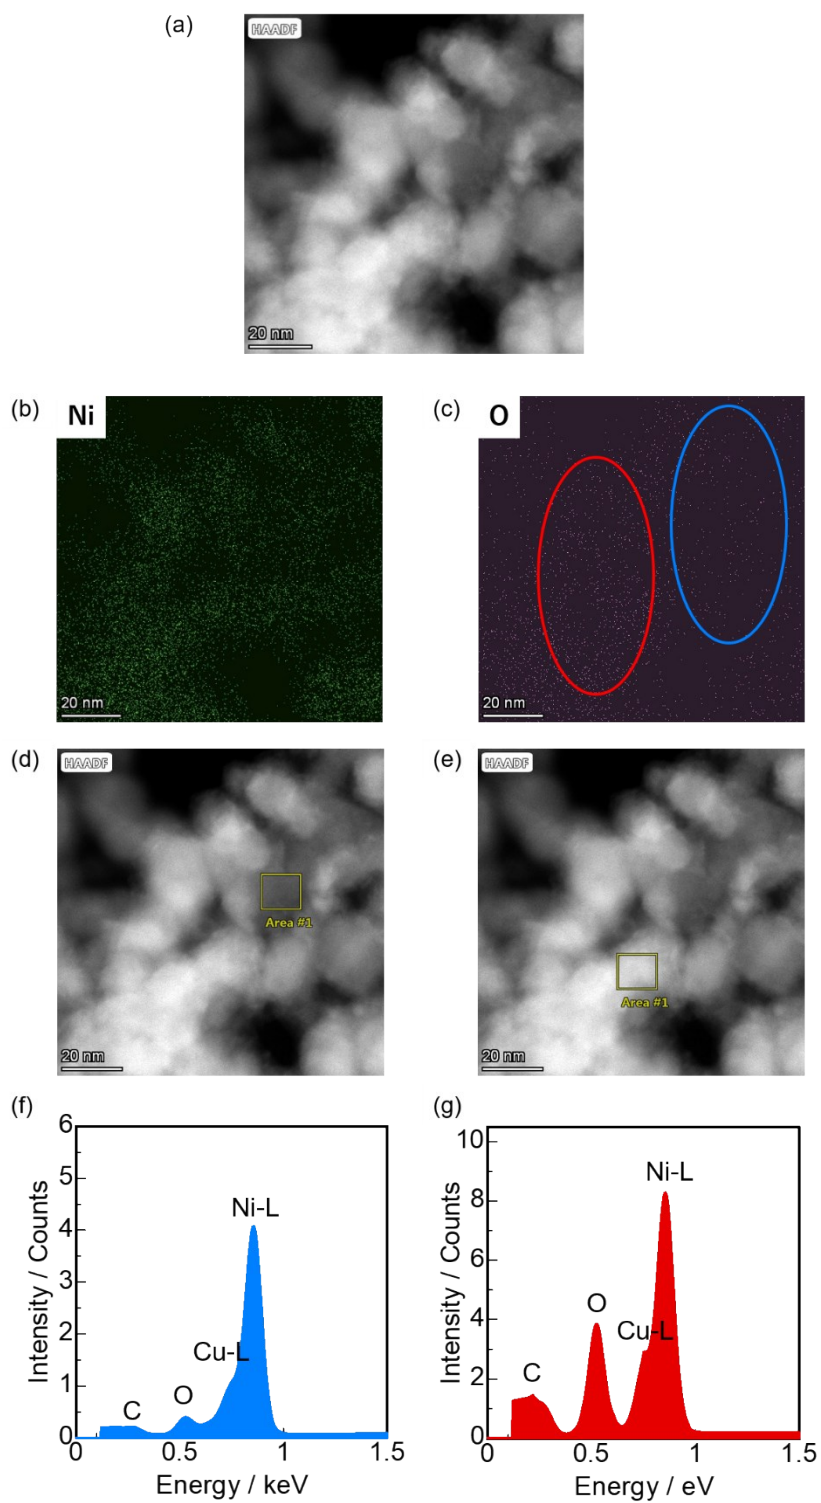

Fig. S3 HAADF-STEM EDS spectra of the freeze-dried Ni/NiO<sub>x</sub>.

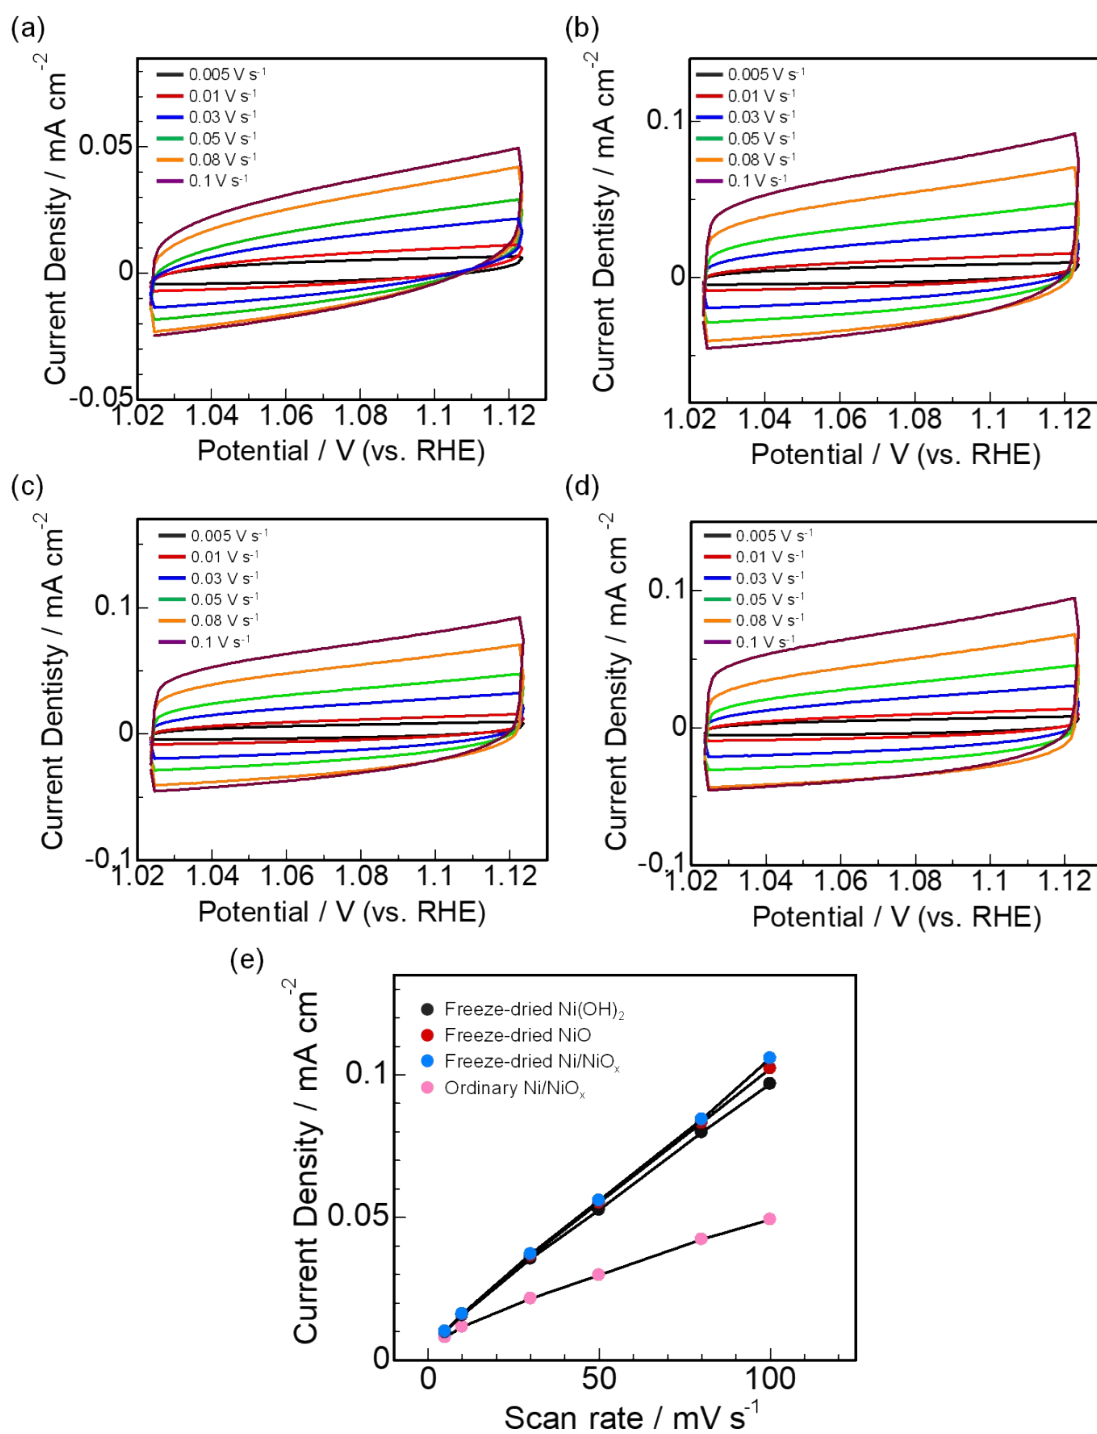

Fig. S4 CV of a) ordinary Ni/NiO<sub>x</sub>, b) freeze-dried Ni/NiO<sub>x</sub>, c) freeze-dried Ni(OH)<sub>2</sub> and d) freeze-dried NiO collected at different scan rate in 1.0 M KOH solution; e) Calculated double-layer capacitance (C<sub>dl</sub>) of each sample.

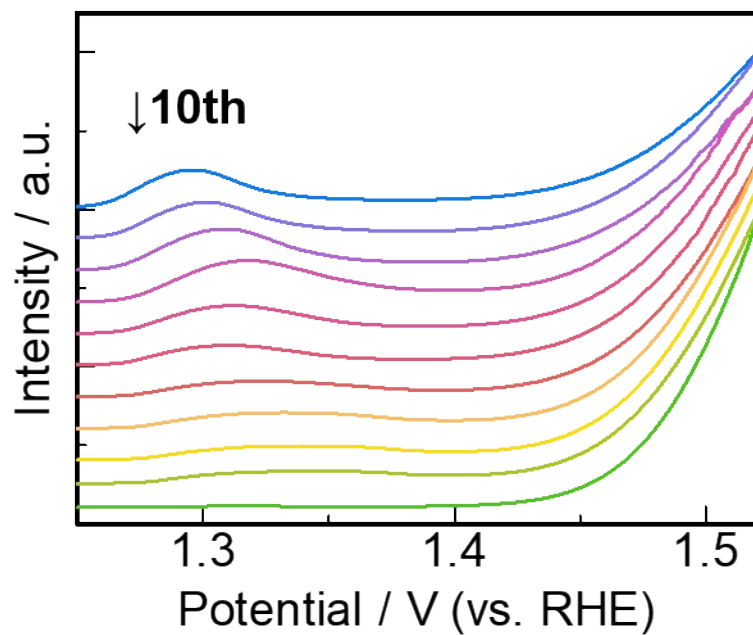

Fig. S5 The OER curves of Freeze-dried Ni/NiO<sub>x</sub> between 1st and 100th.

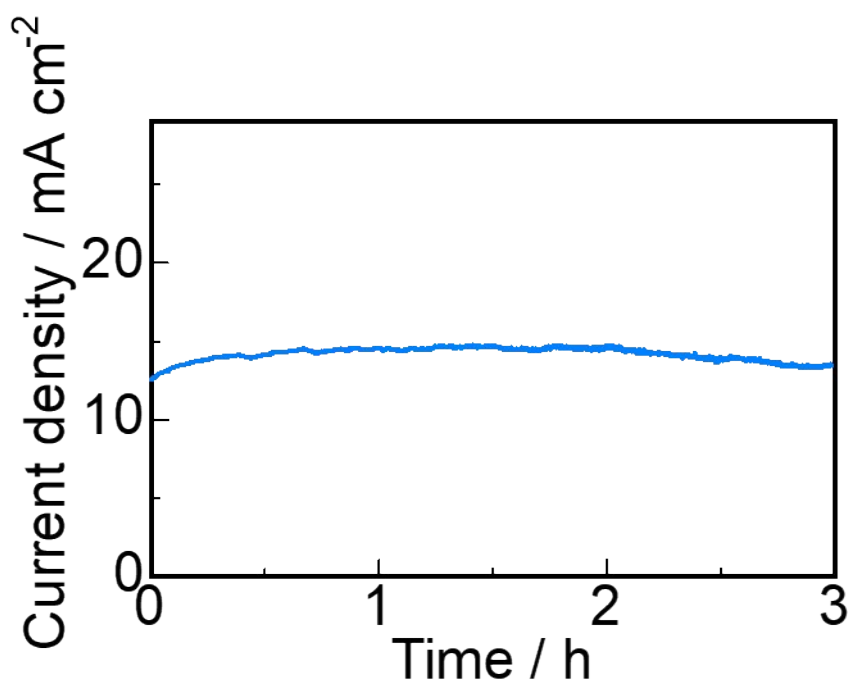

Fig. S6 The chronoamperometric response of freeze-dried Ni/NiO<sub>x</sub> at 1.5V

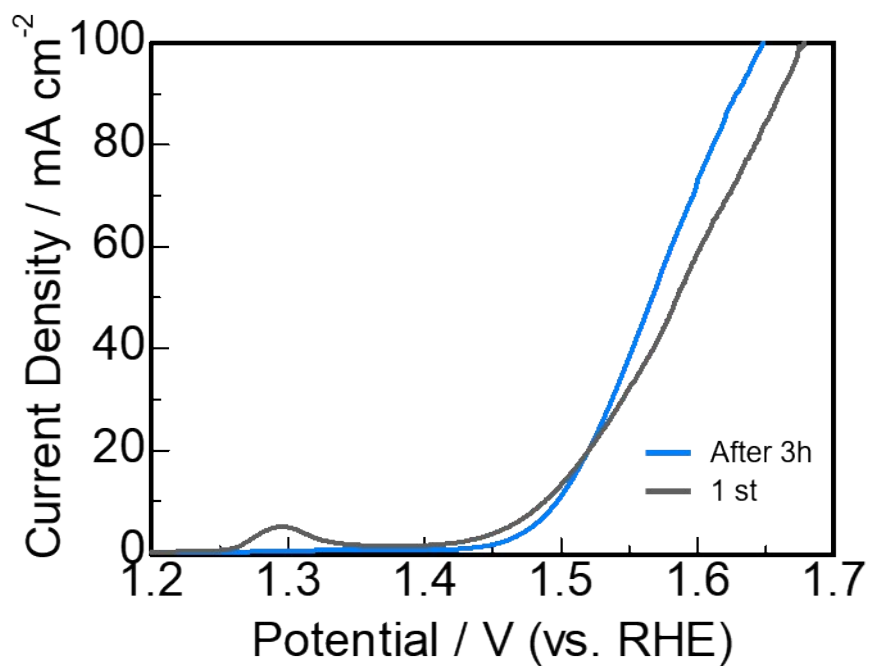

Fig. S7 The OER curves of Freeze-dried Ni/NiO<sub>x</sub> after 3h of the chronoamperometric measurement.

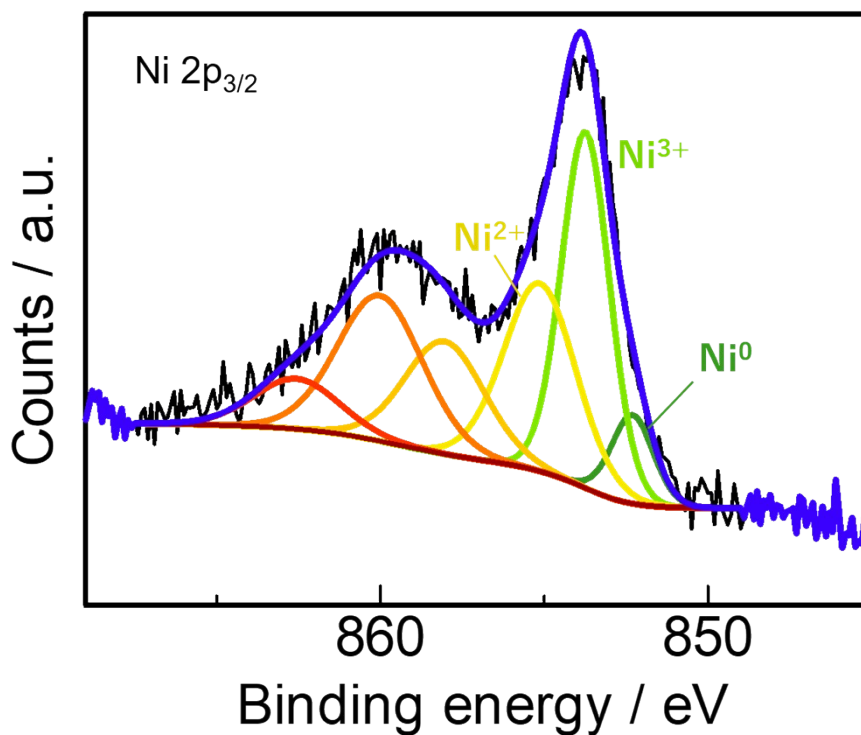

Fig. S8 XPS spectra of Freeze-dried Ni/NiO<sub>x</sub> after 100 scans.



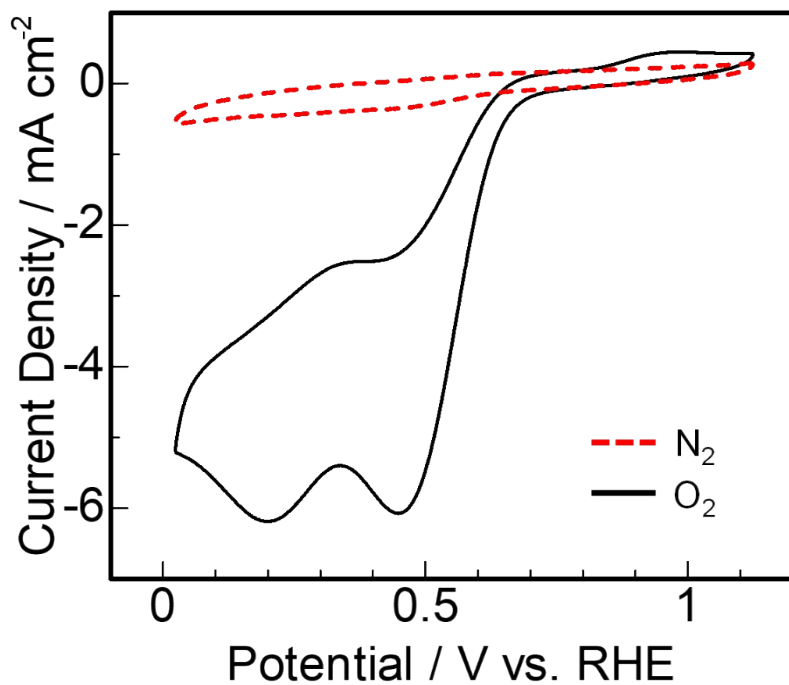

Fig. S9 The CV measurement of freeze-dried Ni/NiO<sub>x</sub> under N<sub>2</sub> or O<sub>2</sub>.

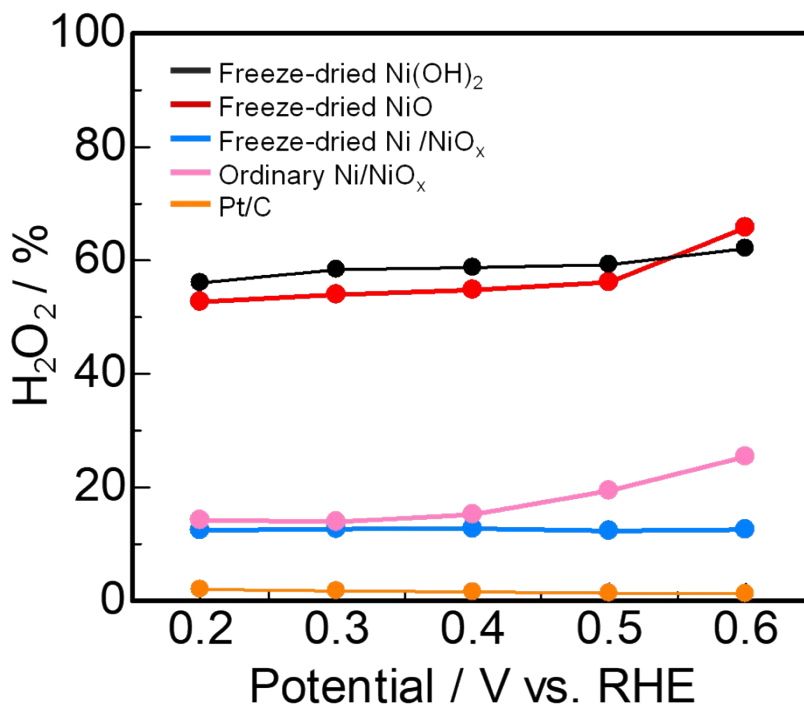

Fig. S10 The yield of hydrogen peroxide.

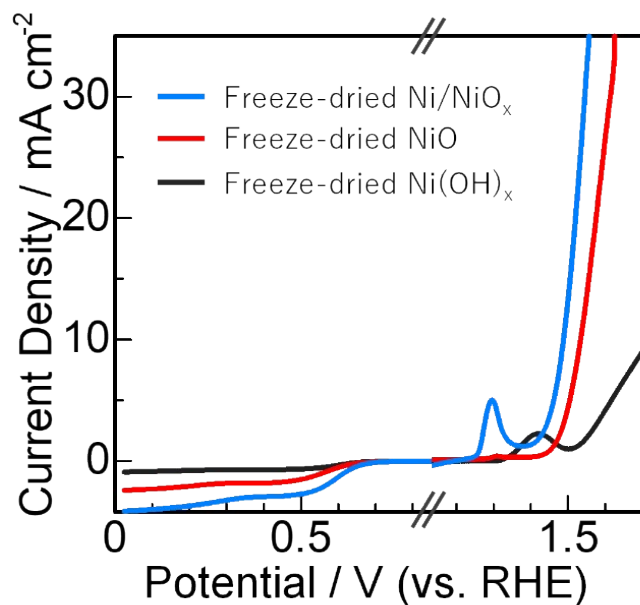

Fig. S11 LSV curves for OER and ORR to evaluate  $\Delta E$ .

**Table S1** Comparison of the OER and ORR activity of freeze-dried Ni/NiO<sub>x</sub> with those of Ni based products in reference. Reference numbers belong to the main text.

|                                  | Over potential<br>( $E_{i=10}$ ) | Tafel slope | Half-wave potential<br>( $E_{1/2}$ ) | Electron transfer<br>number | Electrolyte | Ref. number |
|----------------------------------|----------------------------------|-------------|--------------------------------------|-----------------------------|-------------|-------------|
| Freeze-dried Ni/NiO <sub>x</sub> | 240                              | 37          | 0.62                                 | 3.8                         | 1M KOH      | This work   |
| Freeze-dried NiO                 | 309                              | 50          | 0.55                                 | 3.0                         | 1M KOH      | This work   |
| Freeze-dried Ni(OH) <sub>2</sub> | 370                              | 35          | 0.56                                 | 2.9                         | 1M KOH      | This work   |
| NiO/NF-400                       | 310                              | 54          | –                                    | –                           | 1M KOH      | [15]        |
| Porous Ni/NiO                    | 260                              | 62          | 0.75                                 | 3.8                         | 0.1M KOH    | [22]        |
| Ni/NiO nanosheets                | 300                              | 71          | –                                    | 3.3                         | 0.1M KOH    | [22]        |
| NiO nanosheets                   | 460                              | 178         | –                                    | 3.0                         | 0.1M KOH    | [22]        |
| NiO <sub>x</sub> /Ni             | 390                              | 80          | –                                    | –                           | 1M KOH      | [32]        |
| AC-NiO                           | 320                              | 49          | –                                    | –                           | 1M KOH      | [37]        |
| NiO                              | 360                              | 76          | –                                    | –                           | 1M KOH      | [37]        |
| Ni/NGr                           | 390                              | 98          | 0.62                                 | 3.7-3.9                     | 0.1M KOH    | [38]        |
| Ni/Gr                            | 550                              | –           | –                                    | –                           | 0.1M KOH    | [38]        |
| Ni@NiO/N-C NW                    | 390                              | 100         | –                                    | –                           | 1M KOH      | [39]        |
| Ni-NiO@3DHPG                     | 310                              | 55          | –                                    | –                           | 1M KOH      | [40]        |

## Reference

15. P. T. Babar, A. C. Lokhande, M. G. Gang, B. S. Pawar, S. M. Pawar, J. H. Kim, *J. Ind. Eng. Chem.*, 2018, **60**, 493-497.
22. P. Liu, J. Ran, B. Xia, S. Xi, D. Gao and J. Wang, *Nano-Micro Lett.*, 2020, **12**, 68.
32. G.-Q. Han, Y.-R. Liu, W.-H. Hu, B. Dong, X. Li, X. Shang, Y.-M. Chai, Y.-Q. Liu and C.-G. Liu, *Appl. Surf. Sci.*, 2015, **359**, 172-176.
37. S. Sekar, D. Y. Kim and S. Lee, *Nanomaterials (Basel)*, 2020, **10**, 1382.
38. S. N. Faisal, E. Haque, N. Noorbehesht, H. Liu, M. M. Islam, L. Shabnam, A. K. Roy, E. Pourazadi, M. S. Islam, A. T. Harris and A. I. Minett, *Sustain. Energy Fuels*, 2018, **2**, 2081-2089.
39. A. Xie, J. Zhang, X. Tao, J. Zhang, B. Wei, W. Peng, Y. Tao and S. Luo, *Electrochimica Acta*, 2019, **324**, 134814.
40. N. Ullah, W. Zhao, X. Lu, C. J. Oluigbo, S. A. Shah, M. Zhang, J. Xie and Y. Xu, *Electrochimica Acta*, 2019, **298**, 163-171.
